## Addendum: Leakage? or Secretion? unconventional protein secretion in cancer

**Kohji Yamada<sup>1</sup> and Kiyotsugu Yoshida<sup>1</sup>**

<sup>1</sup>Department of Biochemistry, Jikei University School of Medicine, Minato-ku, Tokyo 105-8461, Japan

*Published:*

**Copyright:** © 2024 Yamada and Yoshida. This is an open access article distributed under the terms of the [Creative Commons Attribution License](#) (CC BY 4.0), which permits unrestricted use, distribution, and reproduction in any medium, provided the original author and source are credited.

**This article has an addendum:** This article received a publication fee waiver.

Original article: Oncotarget. 2023; 14:146–147. <https://doi.org/10.18632/oncotarget.28368>
